# Supplementary material for: Investigation of the Effect of PD-L1 Blockade on Triple Negative Breast Cancer Cells Using Fourier Transform Infrared Spectroscopy
Source: MDPI journal article supplement (doi:10.3390/vaccines7030109), 2019-09-09
Supplement: s1 [file s1]

**Supplementary Table S1:** The spectral assignments and protein components with their assigned wavelength in IR region

| Infrared band                                    | Integrated spectral range (cm <sup>-1</sup> ) |
|--------------------------------------------------|-----------------------------------------------|
| <b>Lipid Components</b>                          |                                               |
| CH <sub>2</sub> symmetric stretching             | 2852–2800                                     |
| CH <sub>2</sub> asymmetric stretching            | 2915–2930                                     |
| CH <sub>3</sub> asymmetric stretching            | 2950–2960                                     |
| *C-H stretching                                  | 2994–2800                                     |
| Olefin = CH                                      | 3000–3027                                     |
| Carbonyl ester (C = O) stretching                | 1745–1731                                     |
| <b>Protein Components</b>                        |                                               |
| Amide I                                          | 1700 – 1600                                   |
| Amide II                                         | 1555 - 1535                                   |
| Amide III                                        | 1350 - 1200                                   |
| <b>Amide I Secondary structure (1700 – 1600)</b> |                                               |
| α-helix                                          | 1660 - 1650                                   |
| Random coil                                      | 1645 - 1630                                   |
| Parallel β-sheet                                 | 1610 - 1635                                   |
| <b>Beta-shoulder (1665 – 1695)</b>               |                                               |
| β-turn                                           | 1680                                          |
| Anti-parallel β-sheet                            | 1695                                          |

\*Total lipid regions.
